# Supplementary material for: Specialized pro-resolution mediators in the bladder: effects of resolvin E1 on diabetic bladder dysfunction in the type 1 diabetic male Akita mouse model
Source: PubMed Central journal article supplement (PMC11191353; doi:10.1186/s12894-024-01519-3), 2024-06-21
Supplement: 12894_2024_1519_MOESM1_ESM.pdf [file 12894_2024_1519_MOESM1_ESM.pdf]

Supplemental: Statistical comparison of all groups at all time points for each endpoint.

Supplementary data file for:

Specialized pro-resolution mediators in the bladder: Transient effect of Resolvin E1 on diabetic bladder dysfunction

By

Anissa Cervantes, Francis M. Hughes, Jr. \*, Huixia Jin, J. Todd Purves

Department of Urology, Duke University Medical Center, Durham, NC 27705, USA

\* Address for correspondence: Francis “Monty” Hughes, Jr., Department of Urology, Duke University Medical Center, P.O. Box 3831, Durham, NC 27710

(Telephone: 1-843-709-2128; Fax: 1-919-681-5507; Email: [monty.hughes@duke.edu](mailto:monty.hughes@duke.edu))

**Blood Glucose - all weeks**One-way Analysis of Variance (ANOVA)

The P value is < 0.0001, considered extremely significant.  
Variation among column means is significantly greater than expected by chance.

Tukey-Kramer Multiple Comparisons Test

If the value of q is greater than 4.349 then the P value is less than 0.05.

| Comparison                         | Mean Difference | q      | P value     |
|------------------------------------|-----------------|--------|-------------|
| 1 week-WT vs 1 week-Diab           | -385.69         | 22.661 | *** P<0.001 |
| 1 week-WT vs 1 week-Diab+RvE       | -379.11         | 19.771 | *** P<0.001 |
| 1 week-WT vs 2 week-WT             | 7.143           | 0.4197 | ns P>0.05   |
| 1 week-WT vs 2 week-Diab           | -423.86         | 23.662 | *** P<0.001 |
| 1 week-WT vs 2 week-Diab+RvE       | -306.11         | 15.964 | *** P<0.001 |
| 1 week-Diab vs 1 week-Diab+RvE     | 6.583           | 0.3334 | ns P>0.05   |
| 1 week-Diab vs 2 week-WT           | 392.83          | 22.241 | *** P<0.001 |
| 1 week-Diab vs 2 week-Diab         | -38.167         | 2.060  | ns P>0.05   |
| 1 week-Diab vs 2 week-Diab+RvE     | 79.583          | 4.030  | ns P>0.05   |
| 1 week-Diab+RvE vs 2 week-WT       | 386.25          | 19.560 | *** P<0.001 |
| 1 week-Diab+RvE vs 2 week-Diab     | -44.750         | 2.181  | ns P>0.05   |
| 1 week-Diab+RvE vs 2 week-Diab+RvE | 73.000          | 3.375  | ns P>0.05   |
| 2 week-WT vs 2 week-Diab           | -431.00         | 23.267 | *** P<0.001 |
| 2 week-WT vs 2 week-Diab+RvE       | -313.25         | 15.863 | *** P<0.001 |
| 2 week-Diab vs 2 week-Diab+RvE     | 117.75          | 5.738  | ** P<0.01   |

| Difference                        | Mean Difference | 95% Confidence Interval |         |
|-----------------------------------|-----------------|-------------------------|---------|
|                                   |                 | From                    | To      |
| 1 week-WT - 1 week-Diab           | -385.69         | -459.72                 | -311.67 |
| 1 week-WT - 1 week-Diab+RvE       | -379.11         | -462.50                 | -295.71 |
| 1 week-WT - 2 week-WT             | 7.143           | -66.882                 | 81.168  |
| 1 week-WT - 2 week-Diab           | -423.86         | -501.77                 | -345.95 |
| 1 week-WT - 2 week-Diab+RvE       | -306.11         | -389.50                 | -222.71 |
| 1 week-Diab - 1 week-Diab+RvE     | 6.583           | -79.303                 | 92.470  |
| 1 week-Diab - 2 week-WT           | 392.83          | 316.01                  | 469.65  |
| 1 week-Diab - 2 week-Diab         | -38.167         | -118.74                 | 42.402  |
| 1 week-Diab - 2 week-Diab+RvE     | 79.583          | -6.303                  | 165.47  |
| 1 week-Diab+RvE - 2 week-WT       | 386.25          | 300.36                  | 472.14  |
| 1 week-Diab+RvE - 2 week-Diab     | -44.750         | -134.01                 | 44.506  |
| 1 week-Diab+RvE - 2 week-Diab+RvE | 73.000          | -21.084                 | 167.08  |
| 2 week-WT - 2 week-Diab           | -431.00         | -511.57                 | -350.43 |
| 2 week-WT - 2 week-Diab+RvE       | -313.25         | -399.14                 | -227.36 |
| 2 week-Diab - 2 week-Diab+RvE     | 117.75          | 28.494                  | 207.01  |

Assumption test: Are the standard deviations of the groups equal?

ANOVA assumes that the data are sampled from populations with identical SDs. This assumption is tested using the method of Bartlett.

Bartlett statistic (corrected) = 25.769

The P value is < 0.0001.

Bartlett's test suggests that the differences among the SDs is extremely significant.

Since ANOVA assumes populations with equal SDs, you should consider transforming your data (reciprocal or log) or selecting a nonparametric test.

Assumption test: Are the data sampled from Gaussian distributions?

ANOVA assumes that the data are sampled from populations that follow Gaussian distributions. This assumption is tested using the method Kolmogorov and Smirnov:

| Group           | KS                      | P Value | Passed normality test? |
|-----------------|-------------------------|---------|------------------------|
| 1 week-WT       | 0.1374                  | >0.10   | Yes                    |
| 1 week-Diab     | 0.2472                  | >0.10   | Yes                    |
| 1 week-Diab+RvE | Too few values to test. |         |                        |
| 2 week-WT       | 0.2937                  | >0.10   | Yes                    |
| 2 week-Diab     | 0.3433                  | 0.0543  | Yes                    |
| 2 week-Diab+RvE | Too few values to test. |         |                        |

Intermediate calculations. ANOVA table

| Source of variation          | Degrees of freedom | Sum of squares | Mean square |
|------------------------------|--------------------|----------------|-------------|
| Treatments (between columns) | 5                  | 1151529        | 230306      |
| Residuals (within columns)   | 26                 | 48665          | 1871.7      |
| Total                        | 31                 | 1200194        |             |

$F = 123.04 = (MS_{\text{treatment}}/MS_{\text{residual}})$

Summary of Data

| Group           | Number of Points | Mean   | Standard Deviation | Standard Error of Mean | Median |
|-----------------|------------------|--------|--------------------|------------------------|--------|
| 1 week-WT       | 7                | 148.14 | 9.353              | 3.535                  | 149.00 |
| 1 week-Diab     | 6                | 533.83 | 70.845             | 28.922                 | 544.00 |
| 1 week-Diab+RvE | 4                | 527.25 | 65.424             | 32.712                 | 520.00 |
| 2 week-WT       | 6                | 141.00 | 10.040             | 4.099                  | 143.50 |
| 2 week-Diab     | 5                | 572.00 | 42.831             | 19.155                 | 600.00 |
| 2 week-Diab+RvE | 4                | 454.25 | 28.064             | 14.032                 | 449.00 |

| Group | Minimum | Maximum | 95% Confidence Interval |    |
|-------|---------|---------|-------------------------|----|
|       |         |         | From                    | To |
|       |         |         |                         |    |

|                 |        |        |        |        |
|-----------------|--------|--------|--------|--------|
| 1 week-WT       | 135.00 | 161.00 | 139.49 | 156.79 |
| 1 week-Diab     | 428.00 | 600.00 | 459.47 | 608.19 |
| 1 week-Diab+RvE | 469.00 | 600.00 | 423.16 | 631.34 |
| 2 week-WT       | 122.00 | 151.00 | 130.46 | 151.54 |
| 2 week-Diab     | 503.00 | 600.00 | 518.83 | 625.17 |
| 2 week-Diab+RvE | 426.00 | 493.00 | 409.60 | 498.90 |

\* \* \*

---

 One-way Analysis of Variance (ANOVA)
 

---

The P value is < 0.0001, considered extremely significant.  
 Variation among column means is significantly greater than expected by chance.

Tukey-Kramer Multiple Comparisons Test

If the value of q is greater than 4.349 then the P value is less than 0.05.

| Comparison                         | Mean Difference | q      | P value     |
|------------------------------------|-----------------|--------|-------------|
| 1 week-WT vs 1 week-Diab           | 8.786           | 19.760 | *** P<0.001 |
| 1 week-WT vs 1 week-Diab+RvE       | 8.536           | 17.040 | *** P<0.001 |
| 1 week-WT vs 2 week-WT             | -0.3810         | 0.8568 | ns P>0.05   |
| 1 week-WT vs 2 week-Diab           | 5.886           | 12.578 | *** P<0.001 |
| 1 week-WT vs 2 week-Diab+RvE       | 5.786           | 11.550 | *** P<0.001 |
| 1 week-Diab vs 1 week-Diab+RvE     | -0.2500         | 0.4846 | ns P>0.05   |
| 1 week-Diab vs 2 week-WT           | -9.167          | 19.867 | *** P<0.001 |
| 1 week-Diab vs 2 week-Diab         | -2.900          | 5.993  | ** P<0.01   |
| 1 week-Diab vs 2 week-Diab+RvE     | -3.000          | 5.815  | ** P<0.01   |
| 1 week-Diab+RvE vs 2 week-WT       | -8.917          | 17.285 | *** P<0.001 |
| 1 week-Diab+RvE vs 2 week-Diab     | -2.650          | 4.943  | * P<0.05    |
| 1 week-Diab+RvE vs 2 week-Diab+RvE | -2.750          | 4.866  | * P<0.05    |
| 2 week-WT vs 2 week-Diab           | 6.267           | 12.950 | *** P<0.001 |
| 2 week-WT vs 2 week-Diab+RvE       | 6.167           | 11.954 | *** P<0.001 |
| 2 week-Diab vs 2 week-Diab+RvE     | -0.1000         | 0.1865 | ns P>0.05   |

| Difference                        | Mean Difference | 95% Confidence Interval |         |
|-----------------------------------|-----------------|-------------------------|---------|
|                                   |                 | From                    | To      |
| 1 week-WT - 1 week-Diab           | 8.786           | 6.852                   | 10.720  |
| 1 week-WT - 1 week-Diab+RvE       | 8.536           | 6.357                   | 10.714  |
| 1 week-WT - 2 week-WT             | -0.3810         | -2.315                  | 1.553   |
| 1 week-WT - 2 week-Diab           | 5.886           | 3.850                   | 7.921   |
| 1 week-WT - 2 week-Diab+RvE       | 5.786           | 3.607                   | 7.964   |
| 1 week-Diab - 1 week-Diab+RvE     | -0.2500         | -2.494                  | 1.994   |
| 1 week-Diab - 2 week-WT           | -9.167          | -11.173                 | -7.160  |
| 1 week-Diab - 2 week-Diab         | -2.900          | -5.005                  | -0.7952 |
| 1 week-Diab - 2 week-Diab+RvE     | -3.000          | -5.244                  | -0.7563 |
| 1 week-Diab+RvE - 2 week-WT       | -8.917          | -11.160                 | -6.673  |
| 1 week-Diab+RvE - 2 week-Diab     | -2.650          | -4.982                  | -0.3183 |
| 1 week-Diab+RvE - 2 week-Diab+RvE | -2.750          | -5.208                  | -0.2922 |
| 2 week-WT - 2 week-Diab           | 6.267           | 4.162                   | 8.371   |
| 2 week-WT - 2 week-Diab+RvE       | 6.167           | 3.923                   | 8.410   |
| 2 week-Diab - 2 week-Diab+RvE     | -0.1000         | -2.432                  | 2.232   |

Assumption test: Are the standard deviations of the groups equal?

ANOVA assumes that the data are sampled from populations with identical SDs. This assumption is tested using the method of Bartlett.

Bartlett statistic (corrected) = 0.8312

The P value is 0.9750.

Bartlett's test suggests that the differences among the SDs is not significant.

Assumption test: Are the data sampled from Gaussian distributions?

ANOVA assumes that the data are sampled from populations that follow Gaussian distributions. This assumption is tested using the method Kolmogorov and Smirnov:

| Group           | KS                      | P Value | Passed normality test? |
|-----------------|-------------------------|---------|------------------------|
| 1 week-WT       | 0.2528                  | >0.10   | Yes                    |
| 1 week-Diab     | 0.1832                  | >0.10   | Yes                    |
| 1 week-Diab+RvE | Too few values to test. |         |                        |
| 2 week-WT       | 0.2932                  | >0.10   | Yes                    |
| 2 week-Diab     | 0.2371                  | >0.10   | Yes                    |
| 2 week-Diab+RvE | Too few values to test. |         |                        |

Intermediate calculations. ANOVA table

| Source of variation          | Degrees of freedom | Sum of squares | Mean square |
|------------------------------|--------------------|----------------|-------------|
| Treatments (between columns) | 5                  | 474.79         | 94.958      |
| Residuals (within columns)   | 26                 | 33.212         | 1.277       |
| Total                        | 31                 | 508.00         |             |

$$F = 74.338 = (MS_{\text{treatment}}/MS_{\text{residual}})$$

Summary of Data

| Group           | Number of Points | Mean   | Standard Deviation | Standard Error of Mean | Median |
|-----------------|------------------|--------|--------------------|------------------------|--------|
| 1 week-WT       | 7                | 29.286 | 1.380              | 0.5216                 | 29.000 |
| 1 week-Diab     | 6                | 20.500 | 1.049              | 0.4282                 | 20.500 |
| 1 week-Diab+RvE | 4                | 20.750 | 0.9574             | 0.4787                 | 20.500 |
| 2 week-WT       | 6                | 29.667 | 1.033              | 0.4216                 | 30.000 |
| 2 week-Diab     | 5                | 23.400 | 1.140              | 0.5099                 | 23.000 |
| 2 week-Diab+RvE | 4                | 23.500 | 1.000              | 0.5000                 | 23.000 |

| Group           | Minimum | Maximum | 95% Confidence Interval |        |
|-----------------|---------|---------|-------------------------|--------|
|                 |         |         | From                    | To     |
| 1 week-WT       | 28.000  | 31.000  | 28.009                  | 30.562 |
| 1 week-Diab     | 19.000  | 22.000  | 19.399                  | 21.601 |
| 1 week-Diab+RvE | 20.000  | 22.000  | 19.227                  | 22.273 |

|                 |        |        |        |        |
|-----------------|--------|--------|--------|--------|
| 2 week-WT       | 28.000 | 31.000 | 28.583 | 30.751 |
| 2 week-Diab     | 22.000 | 25.000 | 21.985 | 24.815 |
| 2 week-Diab+RvE | 23.000 | 25.000 | 21.909 | 25.091 |

\* \* \*

---

 One-way Analysis of Variance (ANOVA)
 

---

The P value is < 0.0001, considered extremely significant.  
 Variation among column means is significantly greater than expected by chance.

Tukey-Kramer Multiple Comparisons Test

If the value of q is greater than 4.349 then the P value is less than 0.05.

| Comparison                         | Mean Difference | q      | P value     |
|------------------------------------|-----------------|--------|-------------|
| 1 week-WT vs 1 week-Diab           | -12.410         | 7.780  | *** P<0.001 |
| 1 week-WT vs 1 week-Diab+RvE       | -13.618         | 7.578  | *** P<0.001 |
| 1 week-WT vs 2 week-WT             | -1.976          | 1.239  | ns P>0.05   |
| 1 week-WT vs 2 week-Diab           | -21.103         | 12.571 | *** P<0.001 |
| 1 week-WT vs 2 week-Diab+RvE       | -14.843         | 8.260  | *** P<0.001 |
| 1 week-Diab vs 1 week-Diab+RvE     | -1.208          | 0.6529 | ns P>0.05   |
| 1 week-Diab vs 2 week-WT           | 10.433          | 6.303  | ** P<0.01   |
| 1 week-Diab vs 2 week-Diab         | -8.693          | 5.008  | * P<0.05    |
| 1 week-Diab vs 2 week-Diab+RvE     | -2.433          | 1.315  | ns P>0.05   |
| 1 week-Diab+RvE vs 2 week-WT       | 11.642          | 6.291  | ** P<0.01   |
| 1 week-Diab+RvE vs 2 week-Diab     | -7.485          | 3.892  | ns P>0.05   |
| 1 week-Diab+RvE vs 2 week-Diab+RvE | -1.225          | 0.6043 | ns P>0.05   |
| 2 week-WT vs 2 week-Diab           | -19.127         | 11.017 | *** P<0.001 |
| 2 week-WT vs 2 week-Diab+RvE       | -12.867         | 6.953  | *** P<0.001 |
| 2 week-Diab vs 2 week-Diab+RvE     | 6.260           | 3.255  | ns P>0.05   |

| Difference                        | Mean Difference | 95% Confidence Interval |         |
|-----------------------------------|-----------------|-------------------------|---------|
|                                   |                 | From                    | To      |
| 1 week-WT - 1 week-Diab           | -12.410         | -19.347                 | -5.472  |
| 1 week-WT - 1 week-Diab+RvE       | -13.618         | -21.434                 | -5.802  |
| 1 week-WT - 2 week-WT             | -1.976          | -8.914                  | 4.961   |
| 1 week-WT - 2 week-Diab           | -21.103         | -28.404                 | -13.801 |
| 1 week-WT - 2 week-Diab+RvE       | -14.843         | -22.659                 | -7.027  |
| 1 week-Diab - 1 week-Diab+RvE     | -1.208          | -9.257                  | 6.841   |
| 1 week-Diab - 2 week-WT           | 10.433          | 3.234                   | 17.633  |
| 1 week-Diab - 2 week-Diab         | -8.693          | -16.244                 | -1.143  |
| 1 week-Diab - 2 week-Diab+RvE     | -2.433          | -10.482                 | 5.616   |
| 1 week-Diab+RvE - 2 week-WT       | 11.642          | 3.593                   | 19.691  |
| 1 week-Diab+RvE - 2 week-Diab     | -7.485          | -15.850                 | 0.8798  |
| 1 week-Diab+RvE - 2 week-Diab+RvE | -1.225          | -10.042                 | 7.592   |
| 2 week-WT - 2 week-Diab           | -19.127         | -26.677                 | -11.576 |
| 2 week-WT - 2 week-Diab+RvE       | -12.867         | -20.916                 | -4.818  |
| 2 week-Diab - 2 week-Diab+RvE     | 6.260           | -2.105                  | 14.625  |

Assumption test: Are the standard deviations of the groups equal?

ANOVA assumes that the data are sampled from populations with identical SDs. This assumption is tested using the method of Bartlett.

Bartlett statistic (corrected) = 7.063

The P value is 0.2160.

Bartlett's test suggests that the differences among the SDs is not significant.

Assumption test: Are the data sampled from Gaussian distributions?

ANOVA assumes that the data are sampled from populations that follow Gaussian distributions. This assumption is tested using the method Kolmogorov and Smirnov:

| Group           | KS                      | P Value | Passed normality test? |
|-----------------|-------------------------|---------|------------------------|
| 1 week-WT       | 0.1744                  | >0.10   | Yes                    |
| 1 week-Diab     | 0.2049                  | >0.10   | Yes                    |
| 1 week-Diab+RvE | Too few values to test. |         |                        |
| 2 week-WT       | 0.1488                  | >0.10   | Yes                    |
| 2 week-Diab     | 0.2599                  | >0.10   | Yes                    |
| 2 week-Diab+RvE | Too few values to test. |         |                        |

Intermediate calculations. ANOVA table

| Source of variation          | Degrees of freedom | Sum of squares | Mean square |
|------------------------------|--------------------|----------------|-------------|
| Treatments (between columns) | 5                  | 1877.2         | 375.45      |
| Residuals (within columns)   | 26                 | 427.42         | 16.439      |
| Total                        | 31                 | 2304.7         |             |

$$F = 22.838 = (MS_{\text{treatment}}/MS_{\text{residual}})$$

Summary of Data

| Group           | Number of Points | Mean   | Standard Deviation | Standard Error of Mean | Median |
|-----------------|------------------|--------|--------------------|------------------------|--------|
| 1 week-WT       | 7                | 23.957 | 2.505              | 0.9469                 | 24.200 |
| 1 week-Diab     | 6                | 36.367 | 3.590              | 1.466                  | 36.500 |
| 1 week-Diab+RvE | 4                | 37.575 | 2.600              | 1.300                  | 36.700 |
| 2 week-WT       | 6                | 25.933 | 3.053              | 1.247                  | 26.200 |
| 2 week-Diab     | 5                | 45.060 | 4.568              | 2.043                  | 46.400 |
| 2 week-Diab+RvE | 4                | 38.800 | 7.637              | 3.818                  | 38.100 |

| Group           | Minimum | Maximum | 95% Confidence Interval |        |
|-----------------|---------|---------|-------------------------|--------|
|                 |         |         | From                    | To     |
| 1 week-WT       | 20.300  | 27.200  | 21.640                  | 26.274 |
| 1 week-Diab     | 32.000  | 41.100  | 32.599                  | 40.135 |
| 1 week-Diab+RvE | 35.600  | 41.300  | 33.438                  | 41.712 |

|                 |        |        |        |        |
|-----------------|--------|--------|--------|--------|
| 2 week-WT       | 21.800 | 30.300 | 22.729 | 29.138 |
| 2 week-Diab     | 37.500 | 49.400 | 39.389 | 50.731 |
| 2 week-Diab+RvE | 30.200 | 48.800 | 26.650 | 50.950 |

\* \* \*

---

 One-way Analysis of Variance (ANOVA)
 

---

The P value is < 0.0001, considered extremely significant.  
 Variation among column means is significantly greater than expected by chance.

Tukey-Kramer Multiple Comparisons Test

If the value of q is greater than 4.349 then the P value is less than 0.05.

| Comparison                         | Mean Difference | q      | P value     |
|------------------------------------|-----------------|--------|-------------|
| 1 week-WT vs 1 week-Diab           | -0.9568         | 16.121 | *** P<0.001 |
| 1 week-WT vs 1 week-Diab+RvE       | -0.9923         | 14.841 | *** P<0.001 |
| 1 week-WT vs 2 week-WT             | -0.05547        | 0.9346 | ns P>0.05   |
| 1 week-WT vs 2 week-Diab           | -1.110          | 17.764 | *** P<0.001 |
| 1 week-WT vs 2 week-Diab+RvE       | -0.8265         | 12.360 | *** P<0.001 |
| 1 week-Diab vs 1 week-Diab+RvE     | -0.03552        | 0.5158 | ns P>0.05   |
| 1 week-Diab vs 2 week-WT           | 0.9013          | 14.634 | *** P<0.001 |
| 1 week-Diab vs 2 week-Diab         | -0.1528         | 2.366  | ns P>0.05   |
| 1 week-Diab vs 2 week-Diab+RvE     | 0.1303          | 1.893  | ns P>0.05   |
| 1 week-Diab+RvE vs 2 week-WT       | 0.9369          | 13.605 | *** P<0.001 |
| 1 week-Diab+RvE vs 2 week-Diab     | -0.1173         | 1.639  | ns P>0.05   |
| 1 week-Diab+RvE vs 2 week-Diab+RvE | 0.1659          | 2.199  | ns P>0.05   |
| 2 week-WT vs 2 week-Diab           | -1.054          | 16.319 | *** P<0.001 |
| 2 week-WT vs 2 week-Diab+RvE       | -0.7710         | 11.196 | *** P<0.001 |
| 2 week-Diab vs 2 week-Diab+RvE     | 0.2832          | 3.957  | ns P>0.05   |

| Difference                        | Mean Difference | 95% Confidence Interval |         |
|-----------------------------------|-----------------|-------------------------|---------|
|                                   |                 | From                    | To      |
| 1 week-WT - 1 week-Diab           | -0.9568         | -1.215                  | -0.6987 |
| 1 week-WT - 1 week-Diab+RvE       | -0.9923         | -1.283                  | -0.7015 |
| 1 week-WT - 2 week-WT             | -0.05547        | -0.3136                 | 0.2027  |
| 1 week-WT - 2 week-Diab           | -1.110          | -1.381                  | -0.8379 |
| 1 week-WT - 2 week-Diab+RvE       | -0.8265         | -1.117                  | -0.5356 |
| 1 week-Diab - 1 week-Diab+RvE     | -0.03552        | -0.3350                 | 0.2640  |
| 1 week-Diab - 2 week-WT           | 0.9013          | 0.6335                  | 1.169   |
| 1 week-Diab - 2 week-Diab         | -0.1528         | -0.4338                 | 0.1281  |
| 1 week-Diab - 2 week-Diab+RvE     | 0.1303          | -0.1692                 | 0.4299  |
| 1 week-Diab+RvE - 2 week-WT       | 0.9369          | 0.6374                  | 1.236   |
| 1 week-Diab+RvE - 2 week-Diab     | -0.1173         | -0.4285                 | 0.1940  |
| 1 week-Diab+RvE - 2 week-Diab+RvE | 0.1659          | -0.1622                 | 0.4940  |
| 2 week-WT - 2 week-Diab           | -1.054          | -1.335                  | -0.7732 |
| 2 week-WT - 2 week-Diab+RvE       | -0.7710         | -1.070                  | -0.4715 |
| 2 week-Diab - 2 week-Diab+RvE     | 0.2832          | -0.02808                | 0.5944  |

Assumption test: Are the standard deviations of the groups equal?

ANOVA assumes that the data are sampled from populations with identical SDs. This assumption is tested using the method of Bartlett.

Bartlett statistic (corrected) = 9.829

The P value is 0.0802.

Bartlett's test suggests that the differences among the SDs is not quite significant.

Assumption test: Are the data sampled from Gaussian distributions?

ANOVA assumes that the data are sampled from populations that follow Gaussian distributions. This assumption is tested using the method Kolmogorov and Smirnov:

| Group           | KS                      | P Value | Passed normality test? |
|-----------------|-------------------------|---------|------------------------|
| 1 week-WT       | 0.1735                  | >0.10   | Yes                    |
| 1 week-Diab     | 0.2352                  | >0.10   | Yes                    |
| 1 week-Diab+RvE | Too few values to test. |         |                        |
| 2 week-WT       | 0.1685                  | >0.10   | Yes                    |
| 2 week-Diab     | 0.1609                  | >0.10   | Yes                    |
| 2 week-Diab+RvE | Too few values to test. |         |                        |

Intermediate calculations. ANOVA table

| Source of variation          | Degrees of freedom | Sum of squares | Mean square |
|------------------------------|--------------------|----------------|-------------|
| Treatments (between columns) | 5                  | 7.180          | 1.436       |
| Residuals (within columns)   | 26                 | 0.5918         | 0.02276     |
| Total                        | 31                 | 7.771          |             |

$$F = 63.086 = (MS_{\text{treatment}}/MS_{\text{residual}})$$

Summary of Data

| Group           | Number of Points | Mean   | Standard Deviation | Standard Error of Mean | Median |
|-----------------|------------------|--------|--------------------|------------------------|--------|
| 1 week-WT       | 7                | 0.8181 | 0.07659            | 0.02895                | 0.8345 |
| 1 week-Diab     | 6                | 1.775  | 0.1604             | 0.06550                | 1.744  |
| 1 week-Diab+RvE | 4                | 1.810  | 0.07786            | 0.03893                | 1.825  |
| 2 week-WT       | 6                | 0.8735 | 0.09252            | 0.03777                | 0.8588 |
| 2 week-Diab     | 5                | 1.928  | 0.2013             | 0.09005                | 1.939  |
| 2 week-Diab+RvE | 4                | 1.645  | 0.2612             | 0.1306                 | 1.657  |

| Group           | Minimum | Maximum | 95% Confidence Interval |        |
|-----------------|---------|---------|-------------------------|--------|
|                 |         |         | From                    | To     |
| 1 week-WT       | 0.7194  | 0.9067  | 0.7472                  | 0.8889 |
| 1 week-Diab     | 1.524   | 1.957   | 1.606                   | 1.943  |
| 1 week-Diab+RvE | 1.714   | 1.877   | 1.687                   | 1.934  |

|                 |        |       |        |        |
|-----------------|--------|-------|--------|--------|
| 2 week-WT       | 0.7786 | 1.010 | 0.7764 | 0.9706 |
| 2 week-Diab     | 1.630  | 2.155 | 1.678  | 2.178  |
| 2 week-Diab+RvE | 1.313  | 1.952 | 1.229  | 2.060  |

\* \* \*

One-way Analysis of Variance (ANOVA)

The P value is < 0.0001, considered extremely significant.  
 Variation among column means is significantly greater than expected by chance.

Tukey-Kramer Multiple Comparisons Test

If the value of q is greater than 4.349 then the P value is less than 0.05.

| Comparison                         | Mean Difference | q      | P value     |
|------------------------------------|-----------------|--------|-------------|
| 1 week-WT vs 1 week-Diab           | -0.1839         | 9.983  | *** P<0.001 |
| 1 week-WT vs 1 week-Diab+RvE       | 0.01010         | 0.4867 | ns P>0.05   |
| 1 week-WT vs 2 week-WT             | -0.004562       | 0.2476 | ns P>0.05   |
| 1 week-WT vs 2 week-Diab           | -0.1178         | 6.075  | ** P<0.01   |
| 1 week-WT vs 2 week-Diab+RvE       | -0.1445         | 6.961  | *** P<0.001 |
| 1 week-Diab vs 1 week-Diab+RvE     | 0.1940          | 9.077  | *** P<0.001 |
| 1 week-Diab vs 2 week-WT           | 0.1794          | 9.381  | *** P<0.001 |
| 1 week-Diab vs 2 week-Diab         | 0.06613         | 3.298  | ns P>0.05   |
| 1 week-Diab vs 2 week-Diab+RvE     | 0.03945         | 1.845  | ns P>0.05   |
| 1 week-Diab+RvE vs 2 week-WT       | -0.01467        | 0.6860 | ns P>0.05   |
| 1 week-Diab+RvE vs 2 week-Diab     | -0.1279         | 5.758  | ** P<0.01   |
| 1 week-Diab+RvE vs 2 week-Diab+RvE | -0.1546         | 6.601  | ** P<0.01   |
| 2 week-WT vs 2 week-Diab           | -0.1132         | 5.647  | ** P<0.01   |
| 2 week-WT vs 2 week-Diab+RvE       | -0.1399         | 6.545  | ** P<0.01   |
| 2 week-Diab vs 2 week-Diab+RvE     | -0.02668        | 1.201  | ns P>0.05   |

| Difference                        | Mean Difference | 95% Confidence Interval |          |
|-----------------------------------|-----------------|-------------------------|----------|
|                                   |                 | From                    | To       |
| 1 week-WT - 1 week-Diab           | -0.1839         | -0.2641                 | -0.1038  |
| 1 week-WT - 1 week-Diab+RvE       | 0.01010         | -0.08018                | 0.1004   |
| 1 week-WT - 2 week-WT             | -0.004562       | -0.084700               | 0.07557  |
| 1 week-WT - 2 week-Diab           | -0.1178         | -0.2021                 | -0.03347 |
| 1 week-WT - 2 week-Diab+RvE       | -0.1445         | -0.2348                 | -0.05420 |
| 1 week-Diab - 1 week-Diab+RvE     | 0.1940          | 0.1011                  | 0.2870   |
| 1 week-Diab - 2 week-WT           | 0.1794          | 0.09621                 | 0.2625   |
| 1 week-Diab - 2 week-Diab         | 0.06613         | -0.02109                | 0.1533   |
| 1 week-Diab - 2 week-Diab+RvE     | 0.03945         | -0.05353                | 0.1324   |
| 1 week-Diab+RvE - 2 week-WT       | -0.01467        | -0.1076                 | 0.07831  |
| 1 week-Diab+RvE - 2 week-Diab     | -0.1279         | -0.2245                 | -0.03129 |
| 1 week-Diab+RvE - 2 week-Diab+RvE | -0.1546         | -0.2564                 | -0.05274 |
| 2 week-WT - 2 week-Diab           | -0.1132         | -0.2005                 | -0.02603 |
| 2 week-WT - 2 week-Diab+RvE       | -0.1399         | -0.2329                 | -0.04694 |
| 2 week-Diab - 2 week-Diab+RvE     | -0.02668        | -0.1233                 | 0.06995  |

Assumption test: Are the standard deviations of the groups equal?

ANOVA assumes that the data are sampled from populations with identical SDs. This assumption is tested using the method of Bartlett.

Bartlett statistic (corrected) = 23.551

The P value is 0.0003.

Bartlett's test suggests that the differences among the SDs is extremely significant.

Since ANOVA assumes populations with equal SDs, you should consider transforming your data (reciprocal or log) or selecting a nonparametric test.

Assumption test: Are the data sampled from Gaussian distributions?

ANOVA assumes that the data are sampled from populations that follow Gaussian distributions. This assumption is tested using the method Kolmogorov and Smirnov:

| Group           | KS                      | P Value | Passed normality test? |
|-----------------|-------------------------|---------|------------------------|
| 1 week-WT       | 0.2311                  | >0.10   | Yes                    |
| 1 week-Diab     | 0.2393                  | >0.10   | Yes                    |
| 1 week-Diab+RvE | Too few values to test. |         |                        |
| 2 week-WT       | 0.3103                  | 0.0729  | Yes                    |
| 2 week-Diab     | 0.2200                  | >0.10   | Yes                    |
| 2 week-Diab+RvE | Too few values to test. |         |                        |

Intermediate calculations. ANOVA table

| Source of variation          | Degrees of freedom | Sum of squares | Mean square |
|------------------------------|--------------------|----------------|-------------|
| Treatments (between columns) | 5                  | 0.1972         | 0.03943     |
| Residuals (within columns)   | 26                 | 0.05703        | 0.002194    |
| Total                        | 31                 | 0.2542         |             |

$F = 17.976 = (MS_{\text{treatment}}/MS_{\text{residual}})$

Summary of Data

| Group           | Number of Points | Mean    | Standard Deviation | Standard Error of Mean | Median  |
|-----------------|------------------|---------|--------------------|------------------------|---------|
| 1 week-WT       | 7                | 0.04614 | 0.01269            | 0.004796               | 0.04378 |
| 1 week-Diab     | 6                | 0.2301  | 0.05999            | 0.02449                | 0.2177  |
| 1 week-Diab+RvE | 4                | 0.03604 | 0.004946           | 0.002473               | 0.03422 |
| 2 week-WT       | 6                | 0.05070 | 0.02948            | 0.01204                | 0.03802 |
| 2 week-Diab     | 5                | 0.1639  | 0.06965            | 0.03115                | 0.1427  |
| 2 week-Diab+RvE | 4                | 0.1906  | 0.06891            | 0.03446                | 0.1989  |

| Group | Minimum | Maximum | 95% Confidence Interval |    |
|-------|---------|---------|-------------------------|----|
|       |         |         | From                    | To |
|       |         |         |                         |    |

|                 |         |         |         |         |
|-----------------|---------|---------|---------|---------|
| 1 week-WT       | 0.02696 | 0.06728 | 0.03440 | 0.05788 |
| 1 week-Diab     | 0.1480  | 0.3167  | 0.1671  | 0.2930  |
| 1 week-Diab+RvE | 0.03238 | 0.04333 | 0.02817 | 0.04391 |
| 2 week-WT       | 0.02703 | 0.1054  | 0.01976 | 0.08165 |
| 2 week-Diab     | 0.1014  | 0.2581  | 0.07748 | 0.2504  |
| 2 week-Diab+RvE | 0.1076  | 0.2571  | 0.08099 | 0.3003  |

\* \* \*

---

 One-way Analysis of Variance (ANOVA)
 

---

The P value is < 0.0001, considered extremely significant.  
 Variation among column means is significantly greater than expected by chance.

Tukey-Kramer Multiple Comparisons Test

If the value of q is greater than 4.232 then the P value is less than 0.05.

| Comparison                         | Mean Difference | q      | P value     |
|------------------------------------|-----------------|--------|-------------|
| 1 week-WT vs 1 week-Diab           | -242.01         | 7.096  | *** P<0.001 |
| 1 week-WT vs 1 week-Diab+RvE       | -70.942         | 2.031  | ns P>0.05   |
| 1 week-WT vs 2 week-WT             | -7.504          | 0.2016 | ns P>0.05   |
| 1 week-WT vs 2 week-Diab           | -448.82         | 10.950 | *** P<0.001 |
| 1 week-WT vs 2 week-Diab+RvE       | -255.03         | 6.853  | *** P<0.001 |
| 1 week-Diab vs 1 week-Diab+RvE     | 171.06          | 5.178  | ** P<0.01   |
| 1 week-Diab vs 2 week-WT           | 234.50          | 6.618  | *** P<0.001 |
| 1 week-Diab vs 2 week-Diab         | -206.82         | 5.252  | ** P<0.01   |
| 1 week-Diab vs 2 week-Diab+RvE     | -13.023         | 0.3675 | ns P>0.05   |
| 1 week-Diab+RvE vs 2 week-WT       | 63.438          | 1.751  | ns P>0.05   |
| 1 week-Diab+RvE vs 2 week-Diab     | -377.88         | 9.423  | *** P<0.001 |
| 1 week-Diab+RvE vs 2 week-Diab+RvE | -184.09         | 5.080  | * P<0.05    |
| 2 week-WT vs 2 week-Diab           | -441.32         | 10.483 | *** P<0.001 |
| 2 week-WT vs 2 week-Diab+RvE       | -247.52         | 6.441  | *** P<0.001 |
| 2 week-Diab vs 2 week-Diab+RvE     | 193.79          | 4.603  | * P<0.05    |

| Difference                        | Mean Difference | 95% Confidence Interval |         |
|-----------------------------------|-----------------|-------------------------|---------|
|                                   |                 | From                    | To      |
| 1 week-WT - 1 week-Diab           | -242.01         | -386.34                 | -97.672 |
| 1 week-WT - 1 week-Diab+RvE       | -70.942         | -218.80                 | 76.912  |
| 1 week-WT - 2 week-WT             | -7.504          | -164.98                 | 149.98  |
| 1 week-WT - 2 week-Diab           | -448.82         | -622.29                 | -275.35 |
| 1 week-WT - 2 week-Diab+RvE       | -255.03         | -412.51                 | -97.548 |
| 1 week-Diab - 1 week-Diab+RvE     | 171.06          | 31.256                  | 310.87  |
| 1 week-Diab - 2 week-WT           | 234.50          | 84.550                  | 384.45  |
| 1 week-Diab - 2 week-Diab         | -206.82         | -373.48                 | -40.154 |
| 1 week-Diab - 2 week-Diab+RvE     | -13.023         | -162.97                 | 136.93  |
| 1 week-Diab+RvE - 2 week-WT       | 63.438          | -89.905                 | 216.78  |
| 1 week-Diab+RvE - 2 week-Diab     | -377.88         | -547.60                 | -208.16 |
| 1 week-Diab+RvE - 2 week-Diab+RvE | -184.09         | -337.43                 | -30.743 |
| 2 week-WT - 2 week-Diab           | -441.32         | -619.49                 | -263.15 |
| 2 week-WT - 2 week-Diab+RvE       | -247.52         | -410.17                 | -84.879 |
| 2 week-Diab - 2 week-Diab+RvE     | 193.79          | 15.624                  | 371.96  |

Assumption test: Are the standard deviations of the groups equal?

ANOVA assumes that the data are sampled from populations with identical SDs. This assumption is tested using the method of Bartlett.

Bartlett statistic (corrected) = 26.945

The P value is < 0.0001.

Bartlett's test suggests that the differences among the SDs is extremely significant.

Since ANOVA assumes populations with equal SDs, you should consider transforming your data (reciprocal or log) or selecting a nonparametric test.

Assumption test: Are the data sampled from Gaussian distributions?

ANOVA assumes that the data are sampled from populations that follow Gaussian distributions. This assumption is tested using the method Kolmogorov and Smirnov:

| Group           | KS     | P Value | Passed normality test? |
|-----------------|--------|---------|------------------------|
| 1 week-WT       | 0.1864 | >0.10   | Yes                    |
| 1 week-Diab     | 0.2147 | >0.10   | Yes                    |
| 1 week-Diab+RvE | 0.1990 | >0.10   | Yes                    |
| 2 week-WT       | 0.1425 | >0.10   | Yes                    |
| 2 week-Diab     | 0.2088 | >0.10   | Yes                    |
| 2 week-Diab+RvE | 0.1285 | >0.10   | Yes                    |

Intermediate calculations. ANOVA table

| Source of variation          | Degrees of freedom | Sum of squares | Mean square |
|------------------------------|--------------------|----------------|-------------|
| Treatments (between columns) | 5                  | 985468         | 197094      |
| Residuals (within columns)   | 40                 | 413569         | 10339       |
| Total                        | 45                 | 1399037        |             |

$F = 19.063 = (MS_{\text{treatment}}/MS_{\text{residual}})$

Summary of Data

| Group           | Number of Points | Mean   | Standard Deviation | Standard Error of Mean | Median |
|-----------------|------------------|--------|--------------------|------------------------|--------|
| 1 week-WT       | 8                | 126.33 | 37.656             | 13.313                 | 124.20 |
| 1 week-Diab     | 10               | 368.33 | 186.24             | 58.895                 | 303.45 |
| 1 week-Diab+RvE | 9                | 197.27 | 68.090             | 22.697                 | 201.40 |
| 2 week-WT       | 7                | 133.83 | 46.525             | 17.585                 | 125.50 |
| 2 week-Diab     | 5                | 575.15 | 49.404             | 22.094                 | 561.50 |
| 2 week-Diab+RvE | 7                | 381.35 | 72.601             | 27.441                 | 389.00 |

| Group | Minimum | Maximum | 95% Confidence Interval |    |
|-------|---------|---------|-------------------------|----|
|       |         |         | From                    | To |
|       |         |         |                         |    |

|                 |        |        |        |        |
|-----------------|--------|--------|--------|--------|
| 1 week-WT       | 72.300 | 197.30 | 94.839 | 157.81 |
| 1 week-Diab     | 205.70 | 838.40 | 235.11 | 501.55 |
| 1 week-Diab+RvE | 116.60 | 310.00 | 144.93 | 249.61 |
| 2 week-WT       | 63.900 | 205.20 | 90.798 | 176.86 |
| 2 week-Diab     | 507.83 | 635.40 | 513.81 | 636.48 |
| 2 week-Diab+RvE | 292.17 | 499.67 | 314.21 | 448.50 |

\* \* \*

---

 One-way Analysis of Variance (ANOVA)
 

---

The P value is < 0.0001, considered extremely significant.  
 Variation among column means is significantly greater than expected by chance.

Tukey-Kramer Multiple Comparisons Test

If the value of q is greater than 4.232 then the P value is less than 0.05.

| Comparison                         | Mean Difference | q      | P value     |
|------------------------------------|-----------------|--------|-------------|
| 1 week-WT vs 1 week-Diab           | -1007.8         | 8.347  | *** P<0.001 |
| 1 week-WT vs 1 week-Diab+RvE       | -327.56         | 2.648  | ns P>0.05   |
| 1 week-WT vs 2 week-WT             | -41.020         | 0.3114 | ns P>0.05   |
| 1 week-WT vs 2 week-Diab           | -1743.7         | 12.017 | *** P<0.001 |
| 1 week-WT vs 2 week-Diab+RvE       | -893.11         | 6.780  | *** P<0.001 |
| 1 week-Diab vs 1 week-Diab+RvE     | 680.24          | 5.816  | ** P<0.01   |
| 1 week-Diab vs 2 week-WT           | 966.78          | 7.707  | *** P<0.001 |
| 1 week-Diab vs 2 week-Diab         | -735.93         | 5.279  | ** P<0.01   |
| 1 week-Diab vs 2 week-Diab+RvE     | 114.69          | 0.9143 | ns P>0.05   |
| 1 week-Diab+RvE vs 2 week-WT       | 286.54          | 2.234  | ns P>0.05   |
| 1 week-Diab+RvE vs 2 week-Diab     | -1416.2         | 9.975  | *** P<0.001 |
| 1 week-Diab+RvE vs 2 week-Diab+RvE | -565.55         | 4.409  | * P<0.05    |
| 2 week-WT vs 2 week-Diab           | -1702.7         | 11.424 | *** P<0.001 |
| 2 week-WT vs 2 week-Diab+RvE       | -852.09         | 6.263  | *** P<0.001 |
| 2 week-Diab vs 2 week-Diab+RvE     | 850.63          | 5.707  | ** P<0.01   |

| Difference                        | Mean Difference | 95% Confidence Interval |         |
|-----------------------------------|-----------------|-------------------------|---------|
|                                   |                 | From                    | To      |
| 1 week-WT - 1 week-Diab           | -1007.8         | -1518.8                 | -496.84 |
| 1 week-WT - 1 week-Diab+RvE       | -327.56         | -850.99                 | 195.87  |
| 1 week-WT - 2 week-WT             | -41.020         | -598.53                 | 516.49  |
| 1 week-WT - 2 week-Diab           | -1743.7         | -2357.8                 | -1129.6 |
| 1 week-WT - 2 week-Diab+RvE       | -893.11         | -1450.6                 | -335.60 |
| 1 week-Diab - 1 week-Diab+RvE     | 680.24          | 185.30                  | 1175.2  |
| 1 week-Diab - 2 week-WT           | 966.78          | 435.93                  | 1497.6  |
| 1 week-Diab - 2 week-Diab         | -735.93         | -1325.9                 | -145.92 |
| 1 week-Diab - 2 week-Diab+RvE     | 114.69          | -416.16                 | 645.55  |
| 1 week-Diab+RvE - 2 week-WT       | 286.54          | -256.32                 | 829.41  |
| 1 week-Diab+RvE - 2 week-Diab     | -1416.2         | -2017.0                 | -815.33 |
| 1 week-Diab+RvE - 2 week-Diab+RvE | -565.55         | -1108.4                 | -22.683 |
| 2 week-WT - 2 week-Diab           | -1702.7         | -2333.5                 | -1072.0 |
| 2 week-WT - 2 week-Diab+RvE       | -852.09         | -1427.9                 | -276.30 |
| 2 week-Diab - 2 week-Diab+RvE     | 850.63          | 219.88                  | 1481.4  |

Assumption test: Are the standard deviations of the groups equal?

ANOVA assumes that the data are sampled from populations with identical SDs. This assumption is tested using the method of Bartlett.

Bartlett statistic (corrected) = 24.052

The P value is 0.0002.

Bartlett's test suggests that the differences among the SDs is extremely significant.

Since ANOVA assumes populations with equal SDs, you should consider transforming your data (reciprocal or log) or selecting a nonparametric test.

Assumption test: Are the data sampled from Gaussian distributions?

ANOVA assumes that the data are sampled from populations that follow Gaussian distributions. This assumption is tested using the method Kolmogorov and Smirnov:

| Group           | KS     | P Value | Passed normality test? |
|-----------------|--------|---------|------------------------|
| 1 week-WT       | 0.1437 | >0.10   | Yes                    |
| 1 week-Diab     | 0.2500 | 0.0766  | Yes                    |
| 1 week-Diab+RvE | 0.1462 | >0.10   | Yes                    |
| 2 week-WT       | 0.1487 | >0.10   | Yes                    |
| 2 week-Diab     | 0.2584 | >0.10   | Yes                    |
| 2 week-Diab+RvE | 0.1269 | >0.10   | Yes                    |

Intermediate calculations. ANOVA table

| Source of variation          | Degrees of freedom | Sum of squares | Mean square |
|------------------------------|--------------------|----------------|-------------|
| Treatments (between columns) | 5                  | 1.453E+07      | 2906022     |
| Residuals (within columns)   | 40                 | 5183207        | 129580      |
| Total                        | 45                 | 1.971E+07      |             |

$F = 22.426 = (MS_{\text{treatment}}/MS_{\text{residual}})$

Summary of Data

| Group           | Number of Points | Mean   | Standard Deviation | Standard Error of Mean | Median |
|-----------------|------------------|--------|--------------------|------------------------|--------|
| 1 week-WT       | 8                | 506.34 | 116.74             | 41.274                 | 505.15 |
| 1 week-Diab     | 10               | 1514.1 | 636.70             | 201.34                 | 1453.1 |
| 1 week-Diab+RvE | 9                | 833.90 | 258.03             | 86.010                 | 823.00 |
| 2 week-WT       | 7                | 547.36 | 176.99             | 66.896                 | 579.20 |
| 2 week-Diab     | 5                | 2250.1 | 307.22             | 137.39                 | 2375.4 |
| 2 week-Diab+RvE | 7                | 1399.4 | 238.48             | 90.138                 | 1371.1 |

| Group | Minimum | Maximum | 95% Confidence Interval |    |
|-------|---------|---------|-------------------------|----|
|       |         |         | From                    | To |
|       |         |         |                         |    |

|                 |        |        |        |        |
|-----------------|--------|--------|--------|--------|
| 1 week-WT       | 349.10 | 696.20 | 408.73 | 603.95 |
| 1 week-Diab     | 875.70 | 3090.5 | 1058.7 | 1969.6 |
| 1 week-Diab+RvE | 482.90 | 1186.9 | 635.56 | 1032.2 |
| 2 week-WT       | 267.50 | 752.80 | 383.66 | 711.05 |
| 2 week-Diab     | 1921.2 | 2580.8 | 1868.7 | 2631.5 |
| 2 week-Diab+RvE | 1080.9 | 1779.6 | 1178.9 | 1620.0 |

\* \* \*

One-way Analysis of Variance (ANOVA)

The P value is 0.4665, considered not significant.  
Variation among column means is not significantly greater than expected by chance.

Post tests

Post tests were not calculated because the P value was greater than 0.05.

Assumption test: Are the standard deviations of the groups equal?

ANOVA assumes that the data are sampled from populations with identical SDs. This assumption is tested using the method of Bartlett.

Bartlett statistic (corrected) = 2.681

The P value is 0.7490.

Bartlett's test suggests that the differences among the SDs is not significant.

Assumption test: Are the data sampled from Gaussian distributions?

ANOVA assumes that the data are sampled from populations that follow Gaussian distributions. This assumption is tested using the method Kolmogorov and Smirnov:

| <u>Group</u>    | <u>KS</u> | <u>P Value</u> | <u>Passed normality test?</u> |
|-----------------|-----------|----------------|-------------------------------|
| 1 week-WT       | 0.1886    | >0.10          | Yes                           |
| 1 week-Diab     | 0.1929    | >0.10          | Yes                           |
| 1 week-Diab+RvE | 0.1942    | >0.10          | Yes                           |
| 2 week-WT       | 0.2107    | >0.10          | Yes                           |
| 2 week-Diab     | 0.1769    | >0.10          | Yes                           |
| 2 week-Diab+RvE | 0.3109    | 0.0395         | No                            |

At least one column failed the normality test with  $P < 0.05$ .  
Consider using a nonparametric test or transforming the data (i.e. converting to logarithms or reciprocals).

Intermediate calculations. ANOVA table

| <u>Source of variation</u>   | <u>Degrees of freedom</u> | <u>Sum of squares</u> | <u>Mean square</u> |
|------------------------------|---------------------------|-----------------------|--------------------|
| Treatments (between columns) | 5                         | 4935.5                | 987.11             |
| Residuals (within columns)   | 40                        | 42055                 | 1051.4             |
| Total                        | 45                        | 46991                 |                    |

$F = 0.9389 = (MS_{\text{treatment}}/MS_{\text{residual}})$

| <b>Group</b>    | <b>Number<br/>of<br/>Points</b> | <b>Mean</b> | <b>Standard<br/>Deviation</b> | <b>Standard<br/>Error of<br/>Mean</b> | <b>Median</b> |
|-----------------|---------------------------------|-------------|-------------------------------|---------------------------------------|---------------|
| 1 week-WT       | 8                               | 37.813      | 37.451                        | 13.241                                | 29.000        |
| 1 week-Diab     | 10                              | 46.950      | 34.959                        | 11.055                                | 49.000        |
| 1 week-Diab+RvE | 9                               | 23.444      | 25.885                        | 8.628                                 | 20.000        |
| 2 week-WT       | 7                               | 56.214      | 34.266                        | 12.951                                | 44.000        |
| 2 week-Diab     | 5                               | 45.600      | 19.165                        | 8.571                                 | 42.000        |
| 2 week-Diab+RvE | 7                               | 41.571      | 35.033                        | 13.241                                | 29.000        |

| <b>Group</b>    | <b>Minimum</b> | <b>Maximum</b> | <b>95% Confidence Interval</b> |           |
|-----------------|----------------|----------------|--------------------------------|-----------|
|                 |                |                | <b>From</b>                    | <b>To</b> |
| 1 week-WT       | 0.000          | 116.50         | 6.498                          | 69.127    |
| 1 week-Diab     | 0.000          | 125.50         | 21.944                         | 71.956    |
| 1 week-Diab+RvE | 0.000          | 74.000         | 3.548                          | 43.341    |
| 2 week-WT       | 11.000         | 109.00         | 24.522                         | 87.906    |
| 2 week-Diab     | 26.000         | 73.000         | 21.807                         | 69.393    |
| 2 week-Diab+RvE | 17.000         | 118.00         | 9.170                          | 73.972    |

\* \* \*

---

 One-way Analysis of Variance (ANOVA)
 

---

The P value is < 0.0001, considered extremely significant.  
 Variation among column means is significantly greater than expected by chance.

Tukey-Kramer Multiple Comparisons Test

If the value of q is greater than 4.232 then the P value is less than 0.05.

| Comparison                         | Mean Difference | q      | P value     |
|------------------------------------|-----------------|--------|-------------|
| 1 week-WT vs 1 week-Diab           | -251.28         | 7.150  | *** P<0.001 |
| 1 week-WT vs 1 week-Diab+RvE       | -56.653         | 1.574  | ns P>0.05   |
| 1 week-WT vs 2 week-WT             | -26.018         | 0.6785 | ns P>0.05   |
| 1 week-WT vs 2 week-Diab           | -456.68         | 10.812 | *** P<0.001 |
| 1 week-WT vs 2 week-Diab+RvE       | -258.73         | 6.748  | *** P<0.001 |
| 1 week-Diab vs 1 week-Diab+RvE     | 194.62          | 5.717  | ** P<0.01   |
| 1 week-Diab vs 2 week-WT           | 225.26          | 6.170  | ** P<0.01   |
| 1 week-Diab vs 2 week-Diab         | -205.40         | 5.062  | * P<0.05    |
| 1 week-Diab vs 2 week-Diab+RvE     | -7.457          | 0.2042 | ns P>0.05   |
| 1 week-Diab+RvE vs 2 week-WT       | 30.635          | 0.8205 | ns P>0.05   |
| 1 week-Diab+RvE vs 2 week-Diab     | -400.02         | 9.680  | *** P<0.001 |
| 1 week-Diab+RvE vs 2 week-Diab+RvE | -202.08         | 5.412  | ** P<0.01   |
| 2 week-WT vs 2 week-Diab           | -430.66         | 9.927  | *** P<0.001 |
| 2 week-WT vs 2 week-Diab+RvE       | -232.71         | 5.876  | ** P<0.01   |
| 2 week-Diab vs 2 week-Diab+RvE     | 197.94          | 4.563  | * P<0.05    |

| Difference                        | Mean Difference | 95% Confidence Interval |         |
|-----------------------------------|-----------------|-------------------------|---------|
|                                   |                 | From                    | To      |
| 1 week-WT - 1 week-Diab           | -251.28         | -400.00                 | -102.55 |
| 1 week-WT - 1 week-Diab+RvE       | -56.653         | -209.01                 | 95.702  |
| 1 week-WT - 2 week-WT             | -26.018         | -188.29                 | 136.26  |
| 1 week-WT - 2 week-Diab           | -456.68         | -635.42                 | -277.93 |
| 1 week-WT - 2 week-Diab+RvE       | -258.73         | -421.01                 | -96.458 |
| 1 week-Diab - 1 week-Diab+RvE     | 194.62          | 50.559                  | 338.69  |
| 1 week-Diab - 2 week-WT           | 225.26          | 70.742                  | 379.77  |
| 1 week-Diab - 2 week-Diab         | -205.40         | -377.13                 | -33.666 |
| 1 week-Diab - 2 week-Diab+RvE     | -7.457          | -161.97                 | 147.06  |
| 1 week-Diab+RvE - 2 week-WT       | 30.635          | -127.38                 | 188.65  |
| 1 week-Diab+RvE - 2 week-Diab     | -400.02         | -574.91                 | -225.14 |
| 1 week-Diab+RvE - 2 week-Diab+RvE | -202.08         | -360.09                 | -44.069 |
| 2 week-WT - 2 week-Diab           | -430.66         | -614.25                 | -247.07 |
| 2 week-WT - 2 week-Diab+RvE       | -232.71         | -400.31                 | -65.119 |
| 2 week-Diab - 2 week-Diab+RvE     | 197.94          | 14.351                  | 381.53  |

Assumption test: Are the standard deviations of the groups equal?

ANOVA assumes that the data are sampled from populations with identical SDs. This assumption is tested using the method of Bartlett.

Bartlett statistic (corrected) = 18.091

The P value is 0.0028.

Bartlett's test suggests that the differences among the SDs is very significant.

Since ANOVA assumes populations with equal SDs, you should consider transforming your data (reciprocal or log) or selecting a nonparametric test.

Assumption test: Are the data sampled from Gaussian distributions?

ANOVA assumes that the data are sampled from populations that follow Gaussian distributions. This assumption is tested using the method Kolmogorov and Smirnov:

| Group           | KS     | P Value | Passed normality test? |
|-----------------|--------|---------|------------------------|
| 1 week-WT       | 0.1549 | >0.10   | Yes                    |
| 1 week-Diab     | 0.2170 | >0.10   | Yes                    |
| 1 week-Diab+RvE | 0.2219 | >0.10   | Yes                    |
| 2 week-WT       | 0.1845 | >0.10   | Yes                    |
| 2 week-Diab     | 0.2435 | >0.10   | Yes                    |
| 2 week-Diab+RvE | 0.2015 | >0.10   | Yes                    |

Intermediate calculations. ANOVA table

| Source of variation          | Degrees of freedom | Sum of squares | Mean square |
|------------------------------|--------------------|----------------|-------------|
| Treatments (between columns) | 5                  | 1018132        | 203626      |
| Residuals (within columns)   | 40                 | 439129         | 10978       |
| Total                        | 45                 | 1457261        |             |

$F = 18.548 = (MS_{\text{treatment}}/MS_{\text{residual}})$

Summary of Data

| Group           | Number of Points | Mean   | Standard Deviation | Standard Error of Mean | Median |
|-----------------|------------------|--------|--------------------|------------------------|--------|
| 1 week-WT       | 8                | 164.13 | 56.375             | 19.932                 | 164.50 |
| 1 week-Diab     | 10               | 415.40 | 181.87             | 57.514                 | 375.50 |
| 1 week-Diab+RvE | 9                | 220.78 | 70.358             | 23.453                 | 202.00 |
| 2 week-WT       | 7                | 190.14 | 72.552             | 27.422                 | 211.00 |
| 2 week-Diab     | 5                | 620.80 | 45.675             | 20.426                 | 604.00 |
| 2 week-Diab+RvE | 7                | 422.86 | 81.288             | 30.724                 | 428.00 |

| Group | 95% Confidence Interval |         |      |    |
|-------|-------------------------|---------|------|----|
|       | Minimum                 | Maximum | From | To |

|                 |        |        |        |        |
|-----------------|--------|--------|--------|--------|
| 1 week-WT       | 89.000 | 263.00 | 116.99 | 211.26 |
| 1 week-Diab     | 255.00 | 852.00 | 285.30 | 545.50 |
| 1 week-Diab+RvE | 149.00 | 347.00 | 166.70 | 274.86 |
| 2 week-WT       | 75.000 | 291.00 | 123.04 | 257.24 |
| 2 week-Diab     | 581.00 | 691.00 | 564.10 | 677.50 |
| 2 week-Diab+RvE | 321.00 | 517.00 | 347.68 | 498.04 |

\* \* \*

---

 One-way Analysis of Variance (ANOVA)
 

---

The P value is 0.0056, considered very significant.  
Variation among column means is significantly greater than expected by chance.

Tukey-Kramer Multiple Comparisons Test

If the value of q is greater than 4.232 then the P value is less than 0.05.

| Comparison                         | Mean Difference | q      | P value   |
|------------------------------------|-----------------|--------|-----------|
| 1 week-WT vs 1 week-Diab           | -8.297          | 2.403  | ns P>0.05 |
| 1 week-WT vs 1 week-Diab+RvE       | -9.860          | 2.788  | ns P>0.05 |
| 1 week-WT vs 2 week-WT             | 6.842           | 1.816  | ns P>0.05 |
| 1 week-WT vs 2 week-Diab           | -13.233         | 3.189  | ns P>0.05 |
| 1 week-WT vs 2 week-Diab+RvE       | -11.063         | 2.937  | ns P>0.05 |
| 1 week-Diab vs 1 week-Diab+RvE     | -1.563          | 0.4673 | ns P>0.05 |
| 1 week-Diab vs 2 week-WT           | 15.139          | 4.221  | ns P>0.05 |
| 1 week-Diab vs 2 week-Diab         | -4.935          | 1.238  | ns P>0.05 |
| 1 week-Diab vs 2 week-Diab+RvE     | -2.766          | 0.7711 | ns P>0.05 |
| 1 week-Diab+RvE vs 2 week-WT       | 16.702          | 4.554  | * P<0.05  |
| 1 week-Diab+RvE vs 2 week-Diab     | -3.373          | 0.8308 | ns P>0.05 |
| 1 week-Diab+RvE vs 2 week-Diab+RvE | -1.203          | 0.3279 | ns P>0.05 |
| 2 week-WT vs 2 week-Diab           | -20.074         | 4.711  | * P<0.05  |
| 2 week-WT vs 2 week-Diab+RvE       | -17.905         | 4.602  | * P<0.05  |
| 2 week-Diab vs 2 week-Diab+RvE     | 2.170           | 0.5091 | ns P>0.05 |

| Difference                        | Mean Difference | 95% Confidence Interval |        |
|-----------------------------------|-----------------|-------------------------|--------|
|                                   |                 | From                    | To     |
| 1 week-WT - 1 week-Diab           | -8.297          | -22.907                 | 6.312  |
| 1 week-WT - 1 week-Diab+RvE       | -9.860          | -24.826                 | 5.106  |
| 1 week-WT - 2 week-WT             | 6.842           | -9.099                  | 22.782 |
| 1 week-WT - 2 week-Diab           | -13.233         | -30.792                 | 4.326  |
| 1 week-WT - 2 week-Diab+RvE       | -11.063         | -27.004                 | 4.878  |
| 1 week-Diab - 1 week-Diab+RvE     | -1.563          | -15.714                 | 12.589 |
| 1 week-Diab - 2 week-WT           | 15.139          | -0.03931                | 30.318 |
| 1 week-Diab - 2 week-Diab         | -4.935          | -21.805                 | 11.935 |
| 1 week-Diab - 2 week-Diab+RvE     | -2.766          | -17.944                 | 12.413 |
| 1 week-Diab+RvE - 2 week-WT       | 16.702          | 1.180                   | 32.224 |
| 1 week-Diab+RvE - 2 week-Diab     | -3.373          | -20.552                 | 13.807 |
| 1 week-Diab+RvE - 2 week-Diab+RvE | -1.203          | -16.725                 | 14.319 |
| 2 week-WT - 2 week-Diab           | -20.074         | -38.109                 | -2.040 |
| 2 week-WT - 2 week-Diab+RvE       | -17.905         | -34.368                 | -1.441 |
| 2 week-Diab - 2 week-Diab+RvE     | 2.170           | -15.865                 | 20.205 |

Assumption test: Are the standard deviations of the groups equal?

ANOVA assumes that the data are sampled from populations with identical SDs. This assumption is tested using the method of Bartlett.

Bartlett statistic (corrected) = 10.147

The P value is 0.0712.

Bartlett's test suggests that the differences among the SDs is not quite significant.

Assumption test: Are the data sampled from Gaussian distributions?

ANOVA assumes that the data are sampled from populations that follow Gaussian distributions. This assumption is tested using the method Kolmogorov and Smirnov:

| <b>Group</b>    | <b>KS</b> | <b>P Value</b> | <b>Passed normality test?</b> |
|-----------------|-----------|----------------|-------------------------------|
| 1 week-WT       | 0.1653    | >0.10          | Yes                           |
| 1 week-Diab     | 0.1478    | >0.10          | Yes                           |
| 1 week-Diab+RvE | 0.2188    | >0.10          | Yes                           |
| 2 week-WT       | 0.1962    | >0.10          | Yes                           |
| 2 week-Diab     | 0.2114    | >0.10          | Yes                           |
| 2 week-Diab+RvE | 0.3535    | 0.0085         | No                            |

At least one column failed the normality test with P<0.05. Consider using a nonparametric test or transforming the data (i.e. converting to logarithms or reciprocals).

Intermediate calculations. ANOVA table

| <b>Source of variation</b>   | <b>Degrees of freedom</b> | <b>Sum of squares</b> | <b>Mean square</b> |
|------------------------------|---------------------------|-----------------------|--------------------|
| Treatments (between columns) | 5                         | 2068.7                | 413.73             |
| Residuals (within columns)   | 40                        | 4237.5                | 105.94             |
| Total                        | 45                        | 6306.1                |                    |

$F = 3.905 = (MS_{treatment} / MS_{residual})$

Summary of Data

| <b>Group</b>    | <b>Number of Points</b> | <b>Mean</b> | <b>Standard Deviation</b> | <b>Standard Error of Mean</b> | <b>Median</b> |
|-----------------|-------------------------|-------------|---------------------------|-------------------------------|---------------|
| 1 week-WT       | 8                       | 79.404      | 14.983                    | 5.297                         | 76.821        |
| 1 week-Diab     | 10                      | 87.701      | 8.607                     | 2.722                         | 89.462        |
| 1 week-Diab+RvE | 9                       | 89.264      | 11.590                    | 3.863                         | 89.337        |
| 2 week-WT       | 7                       | 72.562      | 10.229                    | 3.866                         | 72.689        |
| 2 week-Diab     | 5                       | 92.636      | 3.285                     | 1.469                         | 93.041        |
| 2 week-Diab+RvE | 7                       | 90.467      | 6.505                     | 2.459                         | 91.027        |

**95% Confidence Interval**

| <b>Group</b> | <b>Minimum</b> | <b>Maximum</b> | <b>From</b> | <b>To</b> |
|--------------|----------------|----------------|-------------|-----------|
|--------------|----------------|----------------|-------------|-----------|

| 1 week-WT       | 55.715 | 100.00 | 66.876 | 91.932 |
|-----------------|--------|--------|--------|--------|
| 1 week-Diab     | 71.445 | 100.00 | 81.545 | 93.857 |
| 1 week-Diab+RvE | 70.402 | 100.00 | 80.355 | 98.172 |
| 2 week-WT       | 53.518 | 85.306 | 63.101 | 82.022 |
| 2 week-Diab     | 87.432 | 95.571 | 88.558 | 96.715 |
| 2 week-Diab+RvE | 76.726 | 96.710 | 84.450 | 96.483 |

\* \* \*

---

One-way Analysis of Variance (ANOVA)

---

The P value is 0.9547, considered not significant.  
Variation among column means is not significantly greater than expected by chance.

Post tests

Post tests were not calculated because the P value was greater than 0.05.

Assumption test: Are the standard deviations of the groups equal?

ANOVA assumes that the data are sampled from populations with identical SDs. This assumption is tested using the method of Bartlett.

Bartlett statistic (corrected) = 17.422

The P value is 0.0038.

Bartlett's test suggests that the differences among the SDs is very significant.

Since ANOVA assumes populations with equal SDs, you should consider transforming your data (reciprocal or log) or selecting a nonparametric test.

Assumption test: Are the data sampled from Gaussian distributions?

ANOVA assumes that the data are sampled from populations that follow Gaussian distributions. This assumption is tested using the method Kolmogorov and Smirnov:

| Group           | KS     | P Value | Passed normality test? |
|-----------------|--------|---------|------------------------|
| 1 week-WT       | 0.2699 | 0.0891  | Yes                    |
| 1 week-Diab     | 0.1821 | >0.10   | Yes                    |
| 1 week-Diab+RvE | 0.1645 | >0.10   | Yes                    |
| 2 week-WT       | 0.2092 | >0.10   | Yes                    |
| 2 week-Diab     | 0.3554 | 0.0380  | No                     |
| 2 week-Diab+RvE | 0.1915 | >0.10   | Yes                    |

At least one column failed the normality test with  $P < 0.05$ .  
Consider using a nonparametric test or transforming the data (i.e. converting to logarithms or reciprocals).

Intermediate calculations. ANOVA table

| Source of variation          | Degrees of freedom | Sum of squares | Mean square |
|------------------------------|--------------------|----------------|-------------|
| Treatments (between columns) | 5                  | 58.852         | 11.770      |
| Residuals (within columns)   | 40                 | 2203.5         | 55.087      |
| Total                        | 45                 | 2262.4         |             |

$F = 0.2137 = (MS_{\text{treatment}}/MS_{\text{residual}})$

## Summary of Data

| <b>Group</b>    | <b>Number<br/>of<br/>Points</b> | <b>Mean</b> | <b>Standard<br/>Deviation</b> | <b>Standard<br/>Error of<br/>Mean</b> | <b>Median</b> |
|-----------------|---------------------------------|-------------|-------------------------------|---------------------------------------|---------------|
| 1 week-WT       | 8                               | 44.663      | 10.599                        | 3.747                                 | 48.950        |
| 1 week-Diab     | 10                              | 41.350      | 8.276                         | 2.617                                 | 41.400        |
| 1 week-Diab+RvE | 9                               | 41.633      | 7.545                         | 2.515                                 | 43.000        |
| 2 week-WT       | 7                               | 42.371      | 3.967                         | 1.499                                 | 42.100        |
| 2 week-Diab     | 5                               | 42.602      | 0.9481                        | 0.4240                                | 42.420        |
| 2 week-Diab+RvE | 7                               | 41.947      | 6.420                         | 2.426                                 | 40.500        |

| <b>Group</b>    | <b>Minimum</b> | <b>Maximum</b> | <b>95% Confidence Interval</b> |           |
|-----------------|----------------|----------------|--------------------------------|-----------|
|                 |                |                | <b>From</b>                    | <b>To</b> |
| 1 week-WT       | 31.000         | 57.800         | 35.800                         | 53.525    |
| 1 week-Diab     | 29.700         | 55.000         | 35.430                         | 47.270    |
| 1 week-Diab+RvE | 29.900         | 50.100         | 35.834                         | 47.433    |
| 2 week-WT       | 38.200         | 49.300         | 38.703                         | 46.040    |
| 2 week-Diab     | 41.820         | 44.230         | 41.425                         | 43.779    |
| 2 week-Diab+RvE | 30.960         | 50.560         | 36.010                         | 47.884    |

\* \* \*
